# Supplementary material
Source: Springer Nature journal article supplement (https://www.springermedizin.de/resource/supplementary/13019_2013_817_MOESM2_ESM.pdf/9639158)

# Survival function

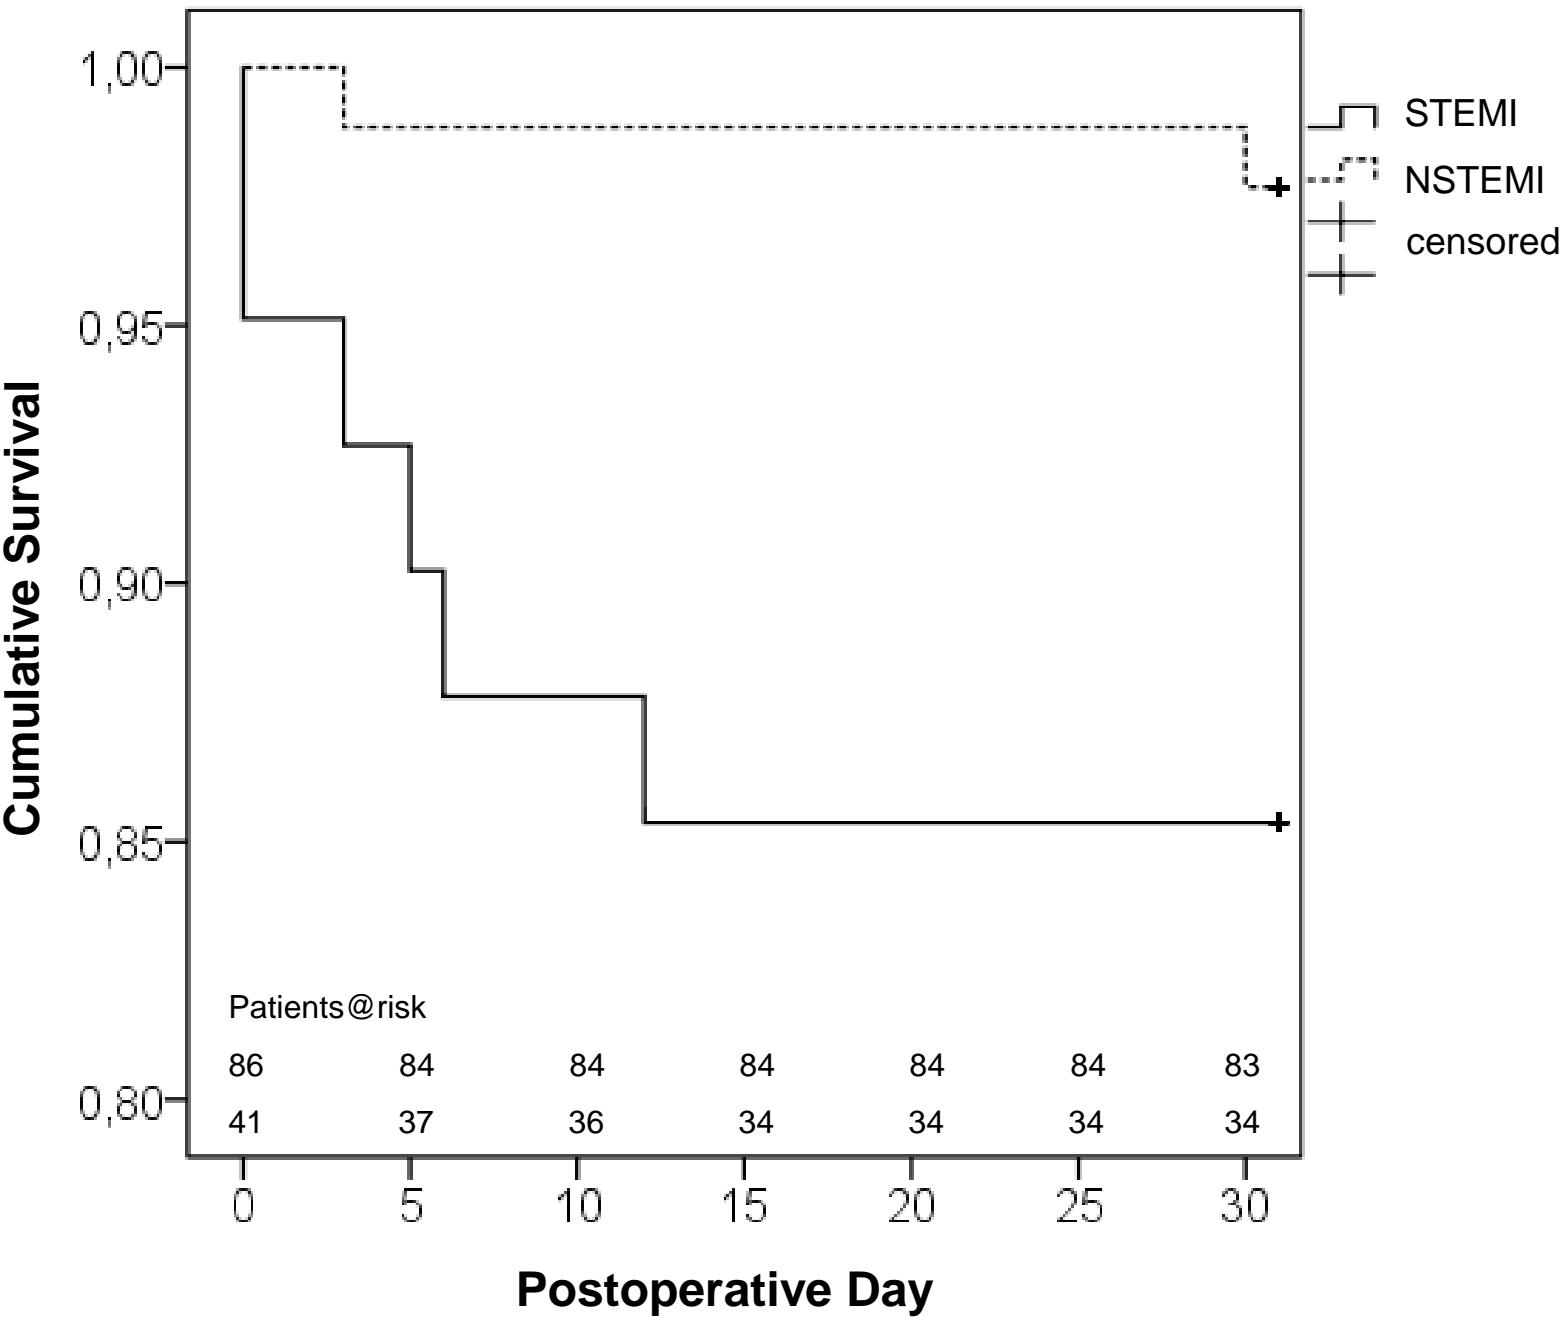

Supplement: MOESM2 [file 9639158]
